# Supplementary material for: A high-performance visible-light-driven all-optical switch enabled by ultra-thin gallium sulfide
Source: Royal Society of Chemistry journal article supplement (doi:10.1039/d0tc05676f), 2021-01-01
Supplement: d0tc05676f1.pdf [file d0tc05676f1.pdf]

## Supplementary Information for

### A high-performance visible-light-driven all-optical switch enabled by ultra-thin gallium sulfide

*Kai Xu, Bao Yue Zhang, Yihong Hu, Muhammad Waqas Khan, Rui Ou, Qijie Ma, Chunmei Shangguan, Billy J. Murdoch, Weijian Chen, Xiaoming Wen, Guanghui Ren\*, Jian Zhen Ou\**

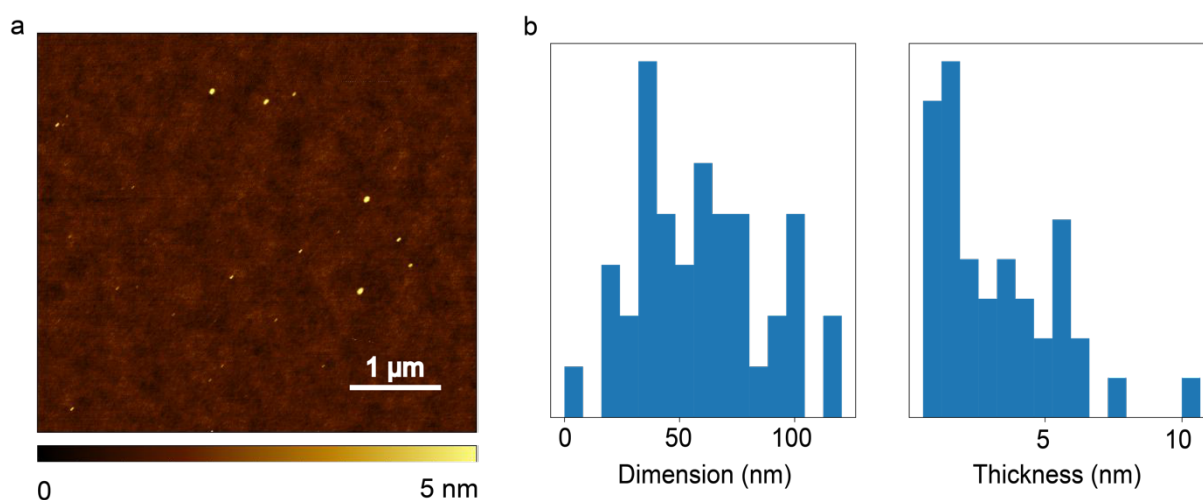

Fig. S1 Statistical analysis of the obtained Ga<sub>2</sub>S<sub>3</sub> nanoflakes based on the AFM profiles. a) Overall AFM images. b) Statistical distribution of the lateral dimension and thickness of Ga<sub>2</sub>S<sub>3</sub> nanoflakes.

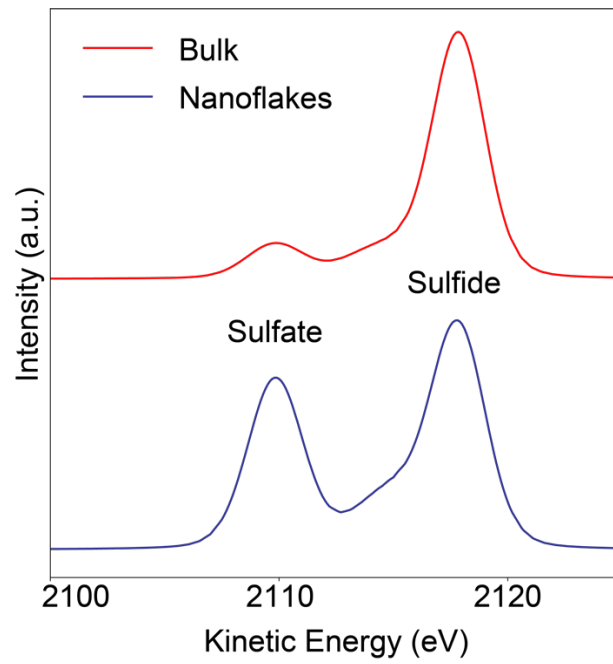

Fig. S2 The S KLL spectrum of  $\text{Ga}_2\text{S}_3$  for bulk and nanoflakes, in which the sulfate peaks are observed on both samples.

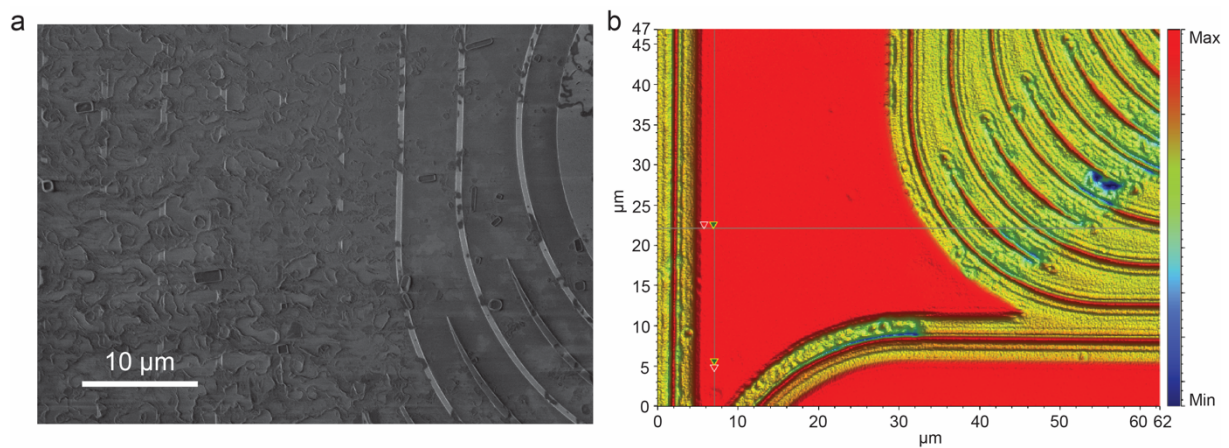

Fig. S3 a) The SEM microscopy image of the device incorporated with the  $\text{Ga}_2\text{S}_3$  layer. b) The corresponding 3D optical surface profiler image.

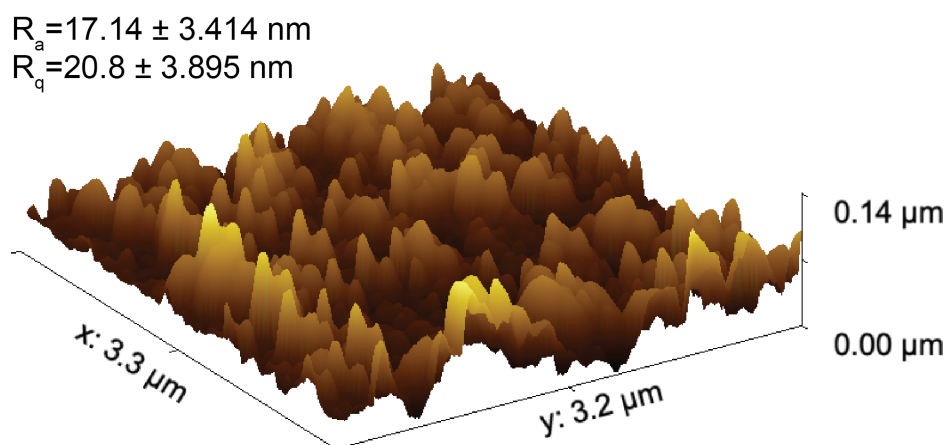

Fig. S4 The surface roughness of the deposited  $\text{Ga}_2\text{S}_3$  layer extracted from the AFM image.

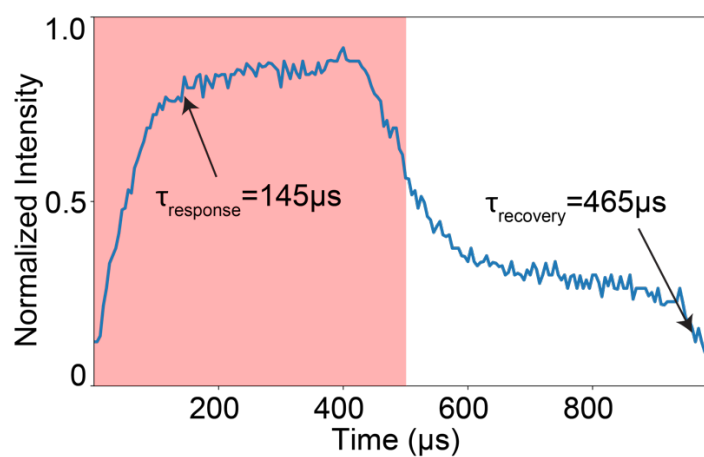

Fig. S5 The 10% to 90% of the response/recovery of the  $\text{Ga}_2\text{S}_3$  based optic-switch under a 1 kHz of control pulse at the excitation wavelength of 532 nm.

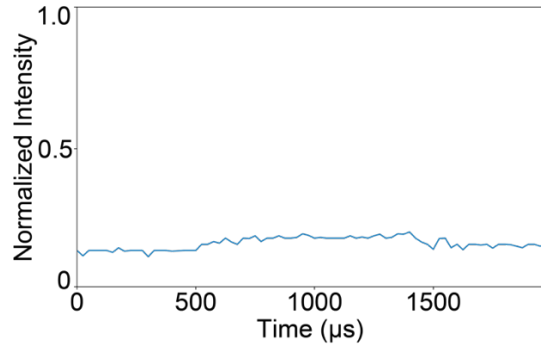

Fig. S6 The switching response of the pure silicon waveguide with 1 kHz of the control pulse at the excitation wavelength of 532 nm.

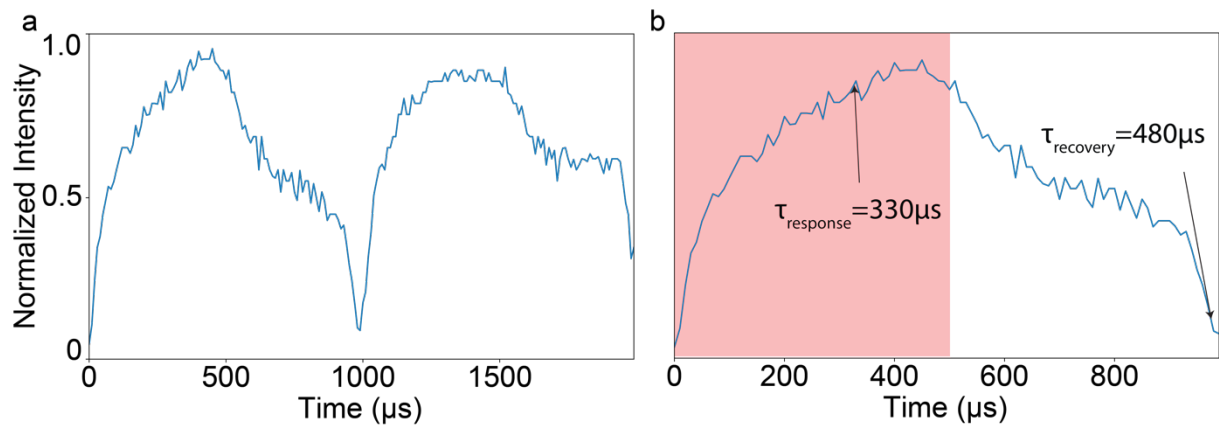

Fig. S7 a) The switching response of  $\text{Ga}_2\text{S}_3$  based optic-switch with 1 kHz of control pulse at the wavelength of 473 nm. b) The corresponding 10% to 90% of the response/recovery time of the  $\text{Ga}_2\text{S}_3$  optic-switch.

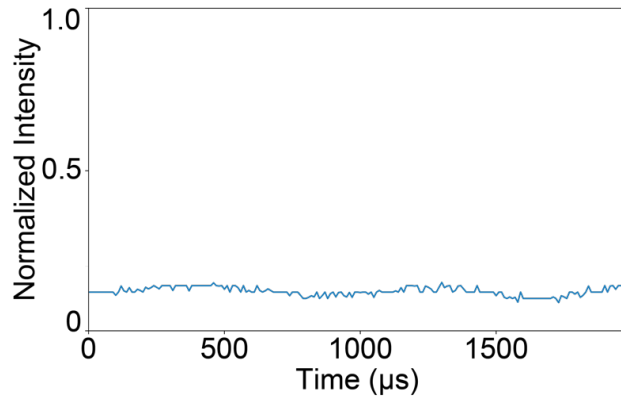

Fig. S8 The switching response of Ga<sub>2</sub>S<sub>3</sub> based optic-switch with 1 kHz of control pulse at the wavelength of 632 nm.

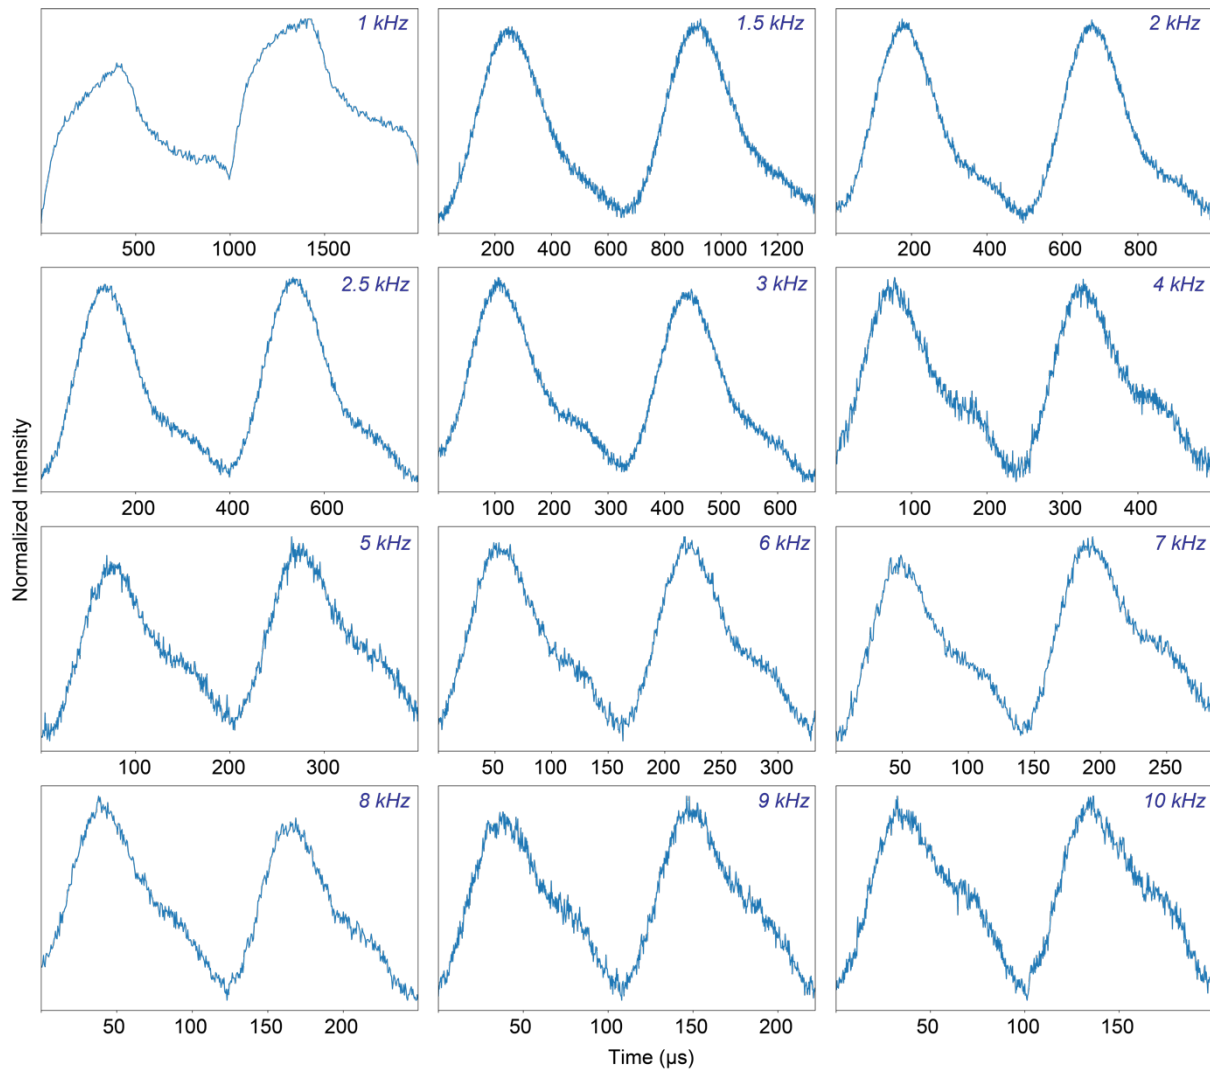

Fig. S9 The switching response of the Ga<sub>2</sub>S<sub>3</sub> based optic-switch vary in control frequency at the wavelength of 532 nm.

**Note S1: The calculation of average excitons lifetime**

The radiative exciton lifetime can be realized in a three-phase exponential decay model.

$$y = y_0 + \sum_{i=1}^3 (A_i \times e^{-\frac{x-x_0}{t_i}}) \quad (S1)$$

Where, the  $y_0$  and  $x_0$  denote the initial values along the x and y axis, whereas the  $A_i$  represents the coefficients of three lifetime components, the  $t_i$  is the time constant for each component.

The average lifetime can be calculated using the following equation.

$$\tau_{average} = \frac{\sum(A_i \times t_i^2)}{\sum(A_i \times t_i)} \quad (S2)$$

**Table S1.** The radiative exciton lifetime fitting result of ultra-thin Ga<sub>2</sub>S<sub>3</sub> nanoflakes

|                              | <b>Value</b>             |
|------------------------------|--------------------------|
| y0                           | 0.04607                  |
| x0                           | 27.90406                 |
| A1                           | 54.24805                 |
| t1                           | 0.43339                  |
| A2                           | 0.93103                  |
| t2                           | 2.02458                  |
| A3                           | 0.09693                  |
| t3                           | 9.12087                  |
| <b>Average lifetime (ns)</b> | <b>0.840</b>             |
| Reduced Chi-Sqr              | 1.86706×10 <sup>-5</sup> |
| Adj. R-Square                | 0.98391                  |

## Note S2: Calculation of interference wavelength of MZI

The interference wavelength on MZI can be calculated in the following equation <sup>[1]</sup>.

$$n_{eff,arm1} \cdot L_{arm1} - n_{eff,arm2} \cdot L_{arm2} = \left(m + \frac{1}{2}\right) \cdot \lambda_0 \quad (S3)$$

Where  $n_{eff,arm1}$  and  $L_{arm1}$  denote the effective refractive index and the length of the long MZI arm, respectively, whereas  $n_{eff,arm2}$  and  $L_{arm2}$  represent to that of shorter arm. The  $m$  in the right side is the interference order, and the  $\lambda_0$  stands for the central wavelength. In addition, the free spectral range (FSR) of the MZI device is given by <sup>[2]</sup>

$$\Delta\lambda_{FSR} = \frac{\lambda^2}{n_g \cdot \Delta L} \quad (S4)$$

From the numerical simulation results shown in Table S2, the effective refractive index on MZI arm before and after the Ga<sub>2</sub>S<sub>3</sub> deposition are 2.27433 and 2.35398, respectively.

Moreover,  $L_{arm1}$  is known as 4.99 mm, while  $L_{arm2}$  is 0.30 mm. With  $\lambda_0 = 1550 \text{ nm}$ , the  $m$  can be calculated on a bare waveguide as follows.

$$m = \frac{2.27433 \times 4.69 \text{ mm}}{1550 \text{ nm}} - 0.5 \approx 6881 \quad (S5)$$

Given that, the wavelength shifting before and after the deposition can be estimated as

$$\lambda_1 = \frac{2.35398 \times 4.99 \text{ mm} - 2.27433 \times 0.3 \text{ mm}}{6881 + 0.5} \approx 1607.798 \text{ nm}$$
$$\Delta\lambda_{material} = \lambda_1 - \lambda_0 \approx 57.798 \text{ nm} \quad (S6)$$

Furthermore, as the effective refractive index on Ga<sub>2</sub>S<sub>3</sub> integrated MZI arm is changed to 2.37694 under the irradiation of a control light beam, the wavelength shifting between excitation light on and off is given



$$\lambda_2 = \frac{2.37694 \times 4.99 \text{ mm} - 2.27433 \times 0.3 \text{ mm}}{6881 + 0.5} \approx 1624.447 \text{ nm}$$

$$\Delta\lambda_{light} = \lambda_2 - \lambda_1 \approx 16.649 \text{ nm} \quad (S7)$$

Given the  $\Delta\lambda_{FSR}$  calculated in Table S2, the interference wavelength will theoretically redshift by 495 periods plus  $\sim 0.083$  nm after integrating material. In addition, the excitation light will further induce a redshift of 141 periods and  $\sim 0.084$  nm, which is close to the measurement.

### Note S3: Calculation of Ga<sub>2</sub>S<sub>3</sub> coverage on MZI device

The real phase shift after the Ga<sub>2</sub>S<sub>3</sub> deposition is measured as ~0.03 nm, which is about ~0.053 nm shorter than the calculation, suggesting that the long arm of MZI is not fully covered by Ga<sub>2</sub>S<sub>3</sub>. So, if  $L_{arm1,ga2s3}$  denotes the length of the covered part on long arm, and  $L_{arm1,bare}$  represents the bare part, the equation S3 can be rewritten in

$$n_{eff,ga2s3} \cdot L_{arm1,ga2s3} + n_{eff,bare}(L_{arm1,bare} - L_{arm2}) = \left(m + \frac{1}{2}\right) \cdot \lambda_{real} \quad (S8)$$

Where, the  $\lambda_{real} = \lambda_1 - 0.053 = 1607.745 \text{ nm}$ , plugging the equation S8 back to the equation S3, then

$$n_{eff,ga2s3} \cdot L_{arm1,ga2s3} + n_{eff,bare} \cdot L_{arm1,ga2s3} = \left(m + \frac{1}{2}\right) (\lambda_{real} - \lambda_0)$$
$$L_{arm1,ga2s3} = \frac{\left(m + \frac{1}{2}\right) (\lambda_{real} - \lambda_0)}{n_{eff,ga2s3} - n_{eff,bare}} \quad (S9)$$

Therefore, the length of long arm with Ga<sub>2</sub>S<sub>3</sub> covered is calculated as ~4.989 mm, the coverage of the Ga<sub>2</sub>S<sub>3</sub> deposition can thus be estimated as ~99.98%

**Table S2.** The effective and group refractive indexes based on the simulation.

|                                  | <b>Bare MZI arm</b> | <b>Ga<sub>2</sub>S<sub>3</sub> deposited arm</b> | <b>Ga<sub>2</sub>S<sub>3</sub> deposited arm on light</b> |
|----------------------------------|---------------------|--------------------------------------------------|-----------------------------------------------------------|
| $n_{eff}$                        | 2.27433             | 2.35398                                          | 2.37694                                                   |
| $n_g$                            | 4.54647             | 4.39346                                          | 4.36024                                                   |
| $\Delta\lambda_{FSR}(\text{nm})$ | 0.1127              | 0.1166                                           | 0.1175                                                    |
